# Supplementary material for: Cu(i)–SNS complexes for outer-sphere hydroboration and hydrosilylation of carbonyls
Source: Royal Society of Chemistry journal article supplement (doi:10.1039/c9cc07266g), 2019-01-01
Supplement: c9cc07266g1.pdf [file c9cc07266g1.pdf]

# **Cu(I)-SNS complexes for outer-sphere hydroboration and hydrosilylation of carbonyls**

Matthew R. Elsby and R. Tom Baker\*

Department of Chemistry and Biomolecular Sciences and Centre for Catalysis  
Research and Innovation, University of Ottawa, Ottawa, Ontario K1N 6N5, Canada

## **Electronic Supporting Information:**

Table of Contents:

**S2** – General Considerations

**S3** – Synthesis and Characterization of Copper Complexes

**S6** – Procedures for Hydrosilylation & Hydroboration Catalysis

**S9** – Mechanistic Studies

**S11** – NMR Spectra

**S24** – X-ray Diffraction Data

**S29** – References

## General Considerations.

Unless otherwise stated, all reactions were carried out under an atmosphere of dry, oxygen-free dinitrogen by means of standard Schlenk or glovebox techniques. Benzene- $d_6$  was degassed by three freeze-pump-thaw cycles, and subsequently dried by running through a column of activated alumina. Toluene, hexanes, and THF were dried on columns of activated alumina using a J. C. Meyer (formerly Glass Contour) solvent purification system.  $^1\text{H}$  NMR spectra were recorded on either a Bruker Avance, Avance II, or Avance III Spectrometer operating at either 300 or 500 MHz with respect to proton nuclei.  $^1\text{H}$  NMR spectra were referenced to residual protons ( $\text{C}_6\text{D}_6$ ,  $\delta$  7.15) with respect to tetramethylsilane at  $\delta$  0.00.  $^{13}\text{C}\{^1\text{H}\}$  NMR spectra were referenced relative to solvent resonance ( $\text{C}_6\text{D}_6$ ,  $\delta$  127.2). Abbreviations: s-singlet, d-doublet, tr-triplet, sept-septet, ov-overlapping, mult-multiplet, br-broad. All reagents were purchased from commercial suppliers. The compounds DBpin,<sup>1</sup> CuCl(IPr),<sup>2</sup> **L1**,<sup>3</sup> and **L2**<sup>4</sup> were all prepared according to literature procedures.

**Synthesis of [Cu(S<sup>Me</sup>NS<sup>Me</sup>)(IPr) [Cu-1].** A vial equipped with a magnetic stir bar was charged with CuCl(IPr) (0.097 g, 0.199 mmol) and dissolved in 3 mL of THF. A 3 mL THF solution of **L1** (0.055 g, 0.199 mmol) and LiHMDS (0.033 g, 0.199 mmol) was added dropwise to the reaction mixture while stirring, resulting in a bright yellow solution that was stirred for 18 h. The solution was evaporated in vacuo, washed with hexanes, and further dried. The residue was extracted into toluene, filtered through Celite, and concentrated in vacuo to yield a pale-yellow powder (0.133 g, 92% yield). X-ray quality crystals were grown from a concentrated solution in toluene layered with hexanes at -30 °C.  **$^1\text{H}$  NMR ( $\text{C}_6\text{D}_6$ , 23 °C, 500 MHz):**  $\delta$  1.04 (d, 12H, CH-(CH<sub>3</sub>)<sub>2</sub>,  $^3J_{\text{HH}} = 7.0$  Hz); 1.31 (d,

12H, CH-(CH<sub>3</sub>)<sub>2</sub>, <sup>3</sup>J<sub>HH</sub> = 7.0 Hz); 1.61 (s, 3H, S-CH<sub>3</sub>); 2.15 (s, 3H, S-CH<sub>3</sub>); 2.72 (sept, 4H, CH-(CH<sub>3</sub>)<sub>2</sub>, <sup>3</sup>J<sub>HH</sub> = 7.0 Hz); 4.39 (s, 2H, N=CH<sub>2</sub>); 6.25 (dd, 1H, Ar-H, <sup>3</sup>J<sub>HH</sub> = 8.5 Hz, <sup>4</sup>J<sub>HH</sub> = 1.0 Hz); 6.30 (ddd, 1H, Ar-H, <sup>3</sup>J<sub>HH</sub> = 8.5, 7.5 Hz, <sup>4</sup>J<sub>HH</sub> = 1.5 Hz); 6.36 (s, 2H, HC=CH); 6.82 (ddd, 1H, Ar-H, <sup>3</sup>J<sub>HH</sub> = 7.5, 7.5 Hz, <sup>4</sup>J<sub>HH</sub> = 1.5 Hz); 6.89 (ddd, 1H, Ar-H, <sup>3</sup>J<sub>HH</sub> = 8.5, 7.5 Hz, <sup>4</sup>J<sub>HH</sub> = 1.5 Hz); 7.02 (ov dd, 1H, Ar-H, <sup>4</sup>J<sub>HH</sub> = 1.5 Hz); 7.04 (m, 4H, Ph-H); 7.06 (ov ddd, 1H, Ar-H, <sup>3</sup>J<sub>HH</sub> = 7.5, 7.5 Hz, <sup>4</sup>J<sub>HH</sub> = 1.5 Hz); 7.17 (m, 2H, Ph-H); 7.29 (dd, 1H, Ar-H, <sup>3</sup>J<sub>HH</sub> = 7.5 Hz, <sup>4</sup>J<sub>HH</sub> = 1.0 Hz); 7.41 (dd, 1H, Ar-H, <sup>3</sup>J<sub>HH</sub> = 7.5 Hz, <sup>4</sup>J<sub>HH</sub> = 1.5 Hz). <sup>13</sup>C{<sup>1</sup>H} NMR (C<sub>6</sub>D<sub>6</sub>, 23 °C, 500 MHz): δ 14.9 (s, 1C, S-CH<sub>3</sub>); 19.8 (s, 1C, S-CH<sub>3</sub>); 23.7 (s, 4C, CH-CH<sub>3</sub>); 23.8 (s, 4C, CH-CH<sub>3</sub>); 28.5 (s, 4C, CH-CH<sub>3</sub>); 53.6 (s, 1C, N-CH<sub>2</sub>); 109.5 (s, 1C, Ar<sub>SNS</sub>-C); 111.4 (s, 1C, Ar<sub>SNS</sub>-C); 118.1 (s, 1C, Ar<sub>SNS</sub>-C); 121.7 (s, 2C, HC=CH); 123.8 (s, 1C, Ph-C); 124.1 (s, 1C, Ar<sub>SNS</sub>-C); 124.3 (s, 1C, Ar<sub>SNS</sub>-C); 125.2 (s, 1C, Ar<sub>SNS</sub>-C); 126.6 (s, 1C, Ar<sub>SNS</sub>-C); 129.6 (s, 1C, Ar<sub>SNS</sub>-C); 129.7 (s, 1C, Ph-C); 132.8 (s, 1C, Ar<sub>SNS</sub>-C); 135.9 (s, 1C, Ar<sub>SNS</sub>-C); 141.2 (s, 1C, Ar<sub>SNS</sub>-C); 145.2 (s, 1C, Ph-C); 159.2 (s, 1C, Ph-C); 186.8 (s, 1C, Cu-C). Calcd for C<sub>42</sub>H<sub>53</sub>Cu N<sub>3</sub>S<sub>2</sub>: %C 69.33; %H 7.34; %N 5.78. Found: %C 69.38; %H 7.04; %N 5.46.

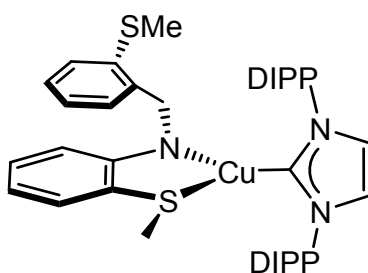

**Synthesis of Cu(S<sup>Me</sup>NS)(IPr) [Cu-2].** In a vial charged with a magnetic stir bar, CuCl(IPr) (0.141 g, 0.289 mmol) and **L2** (0.075 g, 0.289 mmol) were dissolved in 3 mL of toluene giving a dark brown solution. While stirring, potassium tert-butoxide (0.032 g, 0.289 mmol) was slowly added over one min, resulting in an immediate color change to dark red. The

solution was stirred at room temperature for 6 h, filtered through Celite and concentrated in vacuo. The resulting solid was washed with hexanes and further dried, resulting in a dark red solid (0.180 g, 88% yield). X-ray quality crystals were grown from a concentrated toluene solution layered with hexanes at room temperature. **<sup>1</sup>H NMR (C<sub>6</sub>D<sub>6</sub>, 23 °C, 300 MHz):** Isomer #1: δ 1.11 (d, 12H, CH-(CH<sub>3</sub>)<sub>2</sub>, <sup>3</sup>J<sub>HH</sub> = 7.0 Hz); 1.49 (d, 12H, CH-(CH<sub>3</sub>)<sub>2</sub>, <sup>3</sup>J<sub>HH</sub> = 7.0 Hz); 2.02 (s, 3H, S-CH<sub>3</sub>); 2.86 (sept, 4H, CH-(CH<sub>3</sub>)<sub>2</sub>, <sup>3</sup>J<sub>HH</sub> = 7.0 Hz); 6.28 (ddd, 1H, Ar-H, <sup>3</sup>J<sub>HH</sub> = 8, 7 Hz, <sup>4</sup>J<sub>HH</sub> = 1.5 Hz); 6.43 (ov dd, 1H, Ar-H, <sup>3</sup>J<sub>HH</sub> = 7 Hz, <sup>4</sup>J<sub>HH</sub> = 1.5 Hz); 6.44 (s, 2H, HC=CH); 6.65 (ddd, 1H, Ar-H, <sup>3</sup>J<sub>HH</sub> = 8, 7 Hz, <sup>4</sup>J<sub>HH</sub> = 1.5 Hz); 6.70 (ddd, 1H, Ar-H, <sup>3</sup>J<sub>HH</sub> = 8, 7 Hz, <sup>4</sup>J<sub>HH</sub> = 1.5 Hz); 6.77 (dd, 1H, Ar-H, <sup>3</sup>J<sub>HH</sub> = 7 Hz, <sup>4</sup>J<sub>HH</sub> = 1.5 Hz); 6.80 (ov m, 1H, Ar-H); 6.90 (ddd, 1H, Ar-H, <sup>3</sup>J<sub>HH</sub> = 7, 7 Hz, <sup>4</sup>J<sub>HH</sub> = 1.5 Hz); 7.10 (m, 4H, Ph-H); 7.18 (m, 2H, Ph-H); 7.40 (s, 1H, N=CH); 7.81 (dd, 1H, Ar-H, <sup>3</sup>J<sub>HH</sub> = 8 Hz, <sup>4</sup>J<sub>HH</sub> = 1.5 Hz). Isomer #2: δ 1.03 (d, 12H, CH-(CH<sub>3</sub>)<sub>2</sub>, <sup>3</sup>J<sub>HH</sub> = 7.0 Hz); 1.26 (d, 12H, CH-(CH<sub>3</sub>)<sub>2</sub>, <sup>3</sup>J<sub>HH</sub> = 7.0 Hz); 1.89 (s, 3H, S-CH<sub>3</sub>); 2.73 (br sept, 4H, CH-(CH<sub>3</sub>)<sub>2</sub>, <sup>3</sup>J<sub>HH</sub> = 7.0 Hz); 6.34 (ov mult, 1H, Ar-H); 6.34 (s, 2H, HC=CH); 6.78 (ov mult, 4H, Ar-H); 6.85 (dmult, 1H, Ar-H, <sup>3</sup>J<sub>HH</sub> = 8.0 Hz); 7.05 (mult, 4H, Ph-H); 7.18 (mult, 2H, Ph-H); 7.32 (br mult, 1H, Ar-H); 8.03 (br mult, 1H, Ar-H); 8.60 (s, 1H, N=CH). **<sup>13</sup>C{<sup>1</sup>H} NMR (C<sub>6</sub>D<sub>6</sub>, 23 °C, 300 MHz):** Isomer #1: δ 15.8 (s, 1C, S-CH<sub>3</sub>); 24.0 (s, 4C, CH-CH<sub>3</sub>); 24.2 (s, 4C, CH-CH<sub>3</sub>); 28.7 (s, 4C, CH-CH<sub>3</sub>); 121.7 (s, 2C, HC=CH); 124.0, 129.8, 145.5, 154.3 (s, Ph-C); 118.9, 119.9, 125.5, 126.4, 129.0, 129.8, 135.3, 135.9, 137.7, 147.5, 151.1 (s, 1C, Ar<sub>SNS</sub>-C); 133.0 (s, 1C, N=C); 187.2 (s, 1C, Cu-C). Isomer #2: δ 13.9 (s, 1C, S-CH<sub>3</sub>); 23.7 (s, 4C, CH-CH<sub>3</sub>); 24.1 (s, 4C, CH-CH<sub>3</sub>); 28.6 (s, 4C, CH-CH<sub>3</sub>); 122.0 (s, 2C, HC=CH); 123.8, 129.9, 145.5, 155.0 (s, Ph-C); 117.8, 120.3, 125.4, 126.2, 129.1, 129.6, 135.0, 136.3, 138.2, 146.6,

152.3 (s, 1C, Ar<sub>SNS</sub>-C); 125.1 (s, 1C, N=C); 185.7 (s, 1C, Cu-C). Calcd for C<sub>41</sub>H<sub>49</sub>CuN<sub>3</sub>S<sub>2</sub>: %C 69.21; %H 6.94; %N 5.91. Found: %C 68.81; %H 7.43; %N 5.32.

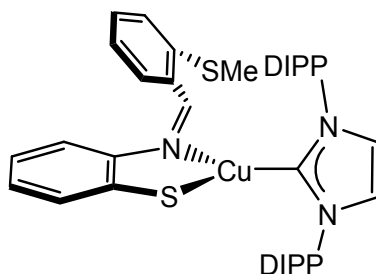

**General Procedure 'A' for Hydroboration of Carbonyls.** A stock solution of **Cu-1/Cu-2** was prepared by dissolving the appropriate Cu-complex (10 mg) in C<sub>6</sub>D<sub>6</sub> (2 mL). A vial containing **Cu-1/Cu-2** (0.001 g, 20  $\mu$ l, 0.001 mmol, 1 mol%) in 0.6 g of C<sub>6</sub>D<sub>6</sub> was charged first with the appropriate substrate, and subsequently with pinacolborane, resulting in an immediate color change from pale-yellow to colorless. The solution was charged to an NMR tube for further analysis. Reaction times varied slightly from 2-10 minutes. Yield was determined by <sup>1</sup>H NMR in reference to internal standard mesitylene.

**General Procedure 'B' for Hydrosilylation of Carbonyls.** A stock solution of **Cu-1** was prepared by dissolving the appropriate Cu-complex (10 mg) in C<sub>6</sub>D<sub>6</sub> (2 mL). A vial containing **Cu1** (0.001 g, 20  $\mu$ l, 0.001 mmol, 1 mol%) in 0.6 g of C<sub>6</sub>D<sub>6</sub> was charged first with the appropriate substrate, and subsequently with triethoxysilane, resulting in an immediate color change from pale-yellow to dark yellow. The solution was charged to an NMR tube for further analysis. Reaction times varied slightly from 2-10 minutes. Yield was determined by <sup>1</sup>H NMR in reference to internal standard mesitylene.

**Hydroboration of benzaldehyde.** Carried out according to *General Procedure A* using benzaldehyde (0.015 g, 14  $\mu$ l, 0.142 mmol), pinacolborane (0.018 g, 20  $\mu$ l, 0.142 mmol), and either **Cu-1** (0.001 g, 20  $\mu$ l, 0.001 mmol, 1 mol %), or **Cu-2** (0.001 g, 20  $\mu$ l, 0.001 mmol, 1 mol %).  $^1\text{H}$  NMR showed quantitative conversion to hydroboration product after 5 min at room temperature.  $^{11}\text{B}$  and  $^1\text{H}$  NMR shifts matched with literature values.<sup>5</sup>

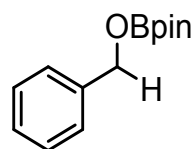

**Hydroboration of acetophenone.** Conducted according to *General Procedure A* using acetophenone (0.017 g, 16  $\mu$ l, 0.142 mmol), pinacolborane (0.018 g, 20  $\mu$ l, 0.142 mmol), and **Cu-1** (0.001 g, 20  $\mu$ l, 0.001 mmol, 1 mol %), or **Cu-2** (0.001 g, 20  $\mu$ l, 0.001 mmol, 1 mol %).  $^1\text{H}$  NMR showed quantitative conversion to hydroboration product after 5 min at room temperature.  $^{11}\text{B}$  and  $^1\text{H}$  NMR shifts matched with literature values.<sup>5</sup>

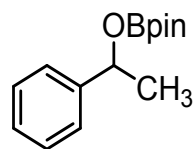

**Hydroboration of benzophenone.** Conducted according to *General Procedure A* using benzophenone (0.025 g, 0.142 mmol), pinacolborane (0.018 g, 20  $\mu$ l, 0.142 mmol), and **Cu-1** (0.001 g, 20  $\mu$ l, 0.001 mmol, 1 mol %), or **Cu-2** (0.001 g, 20  $\mu$ l, 0.001 mmol, 1 mol %).  $^1\text{H}$  NMR showed quantitative conversion to hydroboration product after 10 min at room temperature.  $^{11}\text{B}$  and  $^1\text{H}$  NMR shifts matched with literature values.<sup>5</sup>

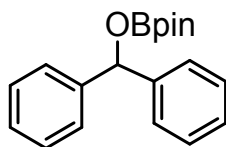

**Hydrosilylation of benzaldehyde with Cu-1.** Carried out according to *General Procedure B* using benzaldehyde (0.015 g, 14  $\mu$ l, 0.142 mmol), triethoxysilane (0.023 g, 26  $\mu$ l, 0.142 mmol), and **Cu-1** (0.001 g, 20  $\mu$ l, 0.001 mmol, 1 mol %).  $^1\text{H}$  NMR showed

quantitative conversion to hydrosilylation product after 5 min at room temperature.  $^1\text{H}$  NMR shifts matched with literature values.<sup>6</sup>

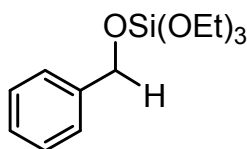

**Hydrosilylation of *trans*-cinnamaldehyde with Cu-1.** Synthesized according to *General Procedure B* using *trans*-cinnamaldehyde (0.018 g, 17  $\mu\text{l}$ , 0.142 mmol), triethoxysilane (0.023 g, 26  $\mu\text{l}$ , 0.142 mmol), and **Cu-1** (0.001 g, 20  $\mu\text{l}$ , 0.001 mmol, 1 mol %).  $^1\text{H}$  NMR showed 92% yield in reference to internal standard mesitylene to hydrosilylation product after 5 min at room temperature.  $^1\text{H}$  NMR shifts matched with literature values.<sup>7</sup> After 24 h, we noticed significant *cis-trans* equilibration in the reaction solution Figure S10b and an unidentified impurity was also present (Figure S10).

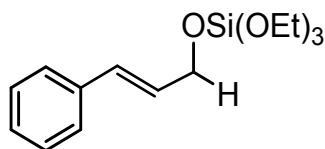

**Hydrosilylation of acetophenone with Cu-1.** Conducted according to *General Procedure B* using acetophenone (0.017 g, 16  $\mu\text{l}$ , 0.142 mmol), triethoxysilane (0.023 g, 26  $\mu\text{l}$ , 0.142 mmol), and **Cu-1** (0.001 g, 20  $\mu\text{l}$ , 0.001 mmol, 1 mol %).  $^1\text{H}$  NMR showed quantitative conversion to hydrosilylation product after 5 min at room temperature.  $^1\text{H}$  NMR shifts matched with literature values.<sup>8</sup>

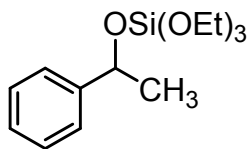

**Hydrosilylation of benzophenone with Cu-1.** Carried out according to *General Procedure B* using benzophenone (0.025 g, 0.142 mmol), triethoxysilane (0.023 g, 26  $\mu\text{l}$ , 0.142 mmol), and **Cu-1** (0.001 g, 20  $\mu\text{l}$ , 0.001 mmol, 1 mol %).  $^1\text{H}$  NMR showed quantitative conversion to hydrosilylation product after 10 min at room temperature.  $^1\text{H}$  NMR shifts matched with literature values.<sup>9</sup>

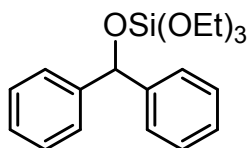

**Hydrosilylation of 5-hexen-2-one with Cu-1.** Conducted according to *General Procedure B* using 5-hexen-2-one (0.013 g, 16  $\mu$ l, 0.142 mmol), triethoxysilane (0.023 g, 26  $\mu$ l, 0.142 mmol), and **Cu-1** (0.001 g, 20  $\mu$ l, 0.001 mmol, 1 mol %).  $^1\text{H}$  NMR showed quantitative conversion to hydrosilylation product after 10 min at room temperature.  $^1\text{H}$  NMR shifts were similar to the known trimethylsilylether analogue.<sup>10</sup>  **$^1\text{H}$  NMR ( $\text{C}_6\text{D}_6$ , 23  $^\circ\text{C}$ , 300 MHz):**  $\delta$  1.17 (tr, 9H,  $\text{OCH}_2\text{CH}_3$ ,  $^3J_{\text{HH}} = 7$  Hz); 1.23 (d, 3H,  $\text{Si}(\text{C})(\text{CH}_3)$ ,  $^3J_{\text{HH}} = 6$  Hz); 1.48 (second order mult, 1H); 1.68 (second order mult, 1H,  $\text{Si}(\text{C})(\text{CH}_2)(\text{CH}_2)$ ); 2.18 (second order mult, 1H,  $\text{Si}(\text{C})(\text{CH}_2)$ ,  $^3J_{\text{HH}} = 6$  Hz); 3.86 (q, 6H,  $\text{OCH}_2\text{CH}_3$ ,  $^3J_{\text{HH}} = 7$  Hz); 4.16 (second order mult, 1H,  $\text{Si}(\text{C})(\text{CH}_2)$ ,  $^3J_{\text{HH}} = 6$  Hz); 4.97 (dmult, 1H,  $=\text{CH}_2$ ,  $^3J_{\text{HH}} = 10$  Hz); 5.06 (dmult, 1H,  $=\text{CH}_2$ ,  $^3J_{\text{HH}} = 17$  Hz); 5.81 (second order mult, 1H,  $=\text{CH}$ ,  $^3J_{\text{HH}} = 17$ , 10 Hz).

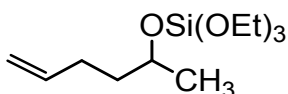

**Attempted hydrosilylation of benzaldehyde with Cu-2.** Carried out according to *General Procedure B* using acetophenone (0.017 g, 16  $\mu$ l, 0.142 mmol), triethoxysilane (0.023 g, 26  $\mu$ l, 0.142 mmol), and **Cu-2** (0.001 g, 20  $\mu$ l, 0.001 mmol, 1 mol %). Crude  $^1\text{H}$  NMR spectrum after 1 h showed no product formation. Decomposition was observed after 24 h. Attempts to heat above 50  $^\circ\text{C}$  resulted in immediate decomposition.

**Attempted hydrosilylation of acetophenone with Cu-2.** Conducted according to *General Procedure B* using benzaldehyde (0.015 g, 14  $\mu$ l, 0.142 mmol), triethoxysilane (0.023 g, 26  $\mu$ l, 0.142 mmol), and **Cu-2** (0.001 g, 20  $\mu$ l, 0.001 mmol, 1 mol %). Crude  $^1\text{H}$  NMR after 1 h showed no product formation. Decomposition was observed after 24 h. Attempts to heat above 50  $^\circ\text{C}$  resulted in immediate decomposition.



## **Mechanistic Studies**

**Stoichiometric Reaction of Cu-1 with HBpin.** A pale-yellow solution of **Cu-1** (0.01 g, 0.014 mmol) in  $C_6D_6$  was charged with pinacolborane (0.002 g, 2  $\mu$ l, 0.014 mmol), resulting in an immediate color change to deep yellow. The crude  $^1H$  NMR spectrum showed complete consumption of **Cu-1** into a new copper-hydride species. Continual monitoring showed decomposition after 2 h at room temperature as evidenced by free **L1** appearing in the  $^1H$  NMR spectrum (*Figures S14 and S15*).

**Stepwise Hydroboration of acetophenone with Cu-1.** The reaction detailed above was repeated to generate the deep yellow solution of copper-hydride. To investigate if this species is an intermediate in a catalytic cycle, acetophenone (0.002, 1.6  $\mu$ l, 0.014 mmol) was added to the solution resulting in an immediate color change to pale yellow. The crude  $^1H$  NMR spectrum showed the growth of both hydroboration product, and the regeneration of **Cu-1** (*Figure S14*).

**Stoichiometric Reaction of Cu-2 with HBpin.** A dark red solution of **Cu-2** (0.015 g, 0.021 mmol) in  $C_6D_6$  was charged with pinacolborane (0.003 g, 3  $\mu$ l, 0.021 mmol), resulting in an immediate color change to orange, and then pale yellow. Crude  $^1H$  NMR showed the complete consumption of **Cu-2** into multiple isomers of a new species with no obvious potential hydride resonances (*Figures S16 and S17*).

**Stoichiometric Reaction of Cu-1 with DBpin.** A  $C_6D_6$  solution of DBpin (0.003g, 0.021 mmol) was charged to a vial containing **Cu-1** (0.015g, 0.021 mmol) resulting in a deep yellow solution. Observation of the  $^1H$  NMR spectrum showed the absence of a singlet at 2.3 ppm as seen in the previous reaction with HBpin. Attempts to observe the Cu–D were unsuccessful due to the signal being drowned out by  $C_6D_6$ .

**Table S1. Survey of most efficient Cu-catalyzed hydrosilylation of carbonyls.**

| Catalyst                                     | mol % | Substrate                                                                           | Additives                 | Silane (equiv.)               | Time/temp    | Yield(%) | ref |
|----------------------------------------------|-------|-------------------------------------------------------------------------------------|---------------------------|-------------------------------|--------------|----------|-----|
| [Cu(S <sup>Me</sup> NS <sup>Me</sup> )(IPr)] | 0.1   | 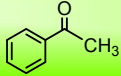   | none                      | (OEt) <sub>3</sub> SiH(1)     | 5 min, rt    | >99      |     |
| [Cu(H)(PPh <sub>3</sub> )]                   | 3     |    | none                      | Ph <sub>2</sub> MeSiH (2.5)   | 120 min, rt  | 98       | 11  |
| [Cu(H)(PPh <sub>3</sub> )]                   | 3     |    | none                      | PMHS (2.5)                    | 10 h, rt     | 97       | 11  |
| [CuF <sub>2</sub> ] / (S)-BINAP              | 4     |    | none                      | Ph <sub>3</sub> SiH (1.5)     | 2 h, rt      | 98       | 12  |
| [Cu(Cl)(IPr)]                                | 3     |    | NaO <sup>t</sup> Bu (12%) | Et <sub>3</sub> SiH (3)       | 3 h, rt      | 98       | 13  |
| CuCl / IPr•HBF <sub>4</sub>                  | 3     |    | NaO <sup>t</sup> Bu (20%) | Et <sub>3</sub> SiH (5)       | 8 h, 80°C    | 100      | 14  |
| [Cu(Cl)(ICy)]                                | 3     |    | NaO <sup>t</sup> Bu (12%) | Et <sub>3</sub> SiH (3)       | 25 min, 80°C | 99       | 14  |
| [(IPr) <sub>2</sub> Cu] BF <sub>4</sub>      | 3     |    | NaO <sup>t</sup> Bu (12%) | Et <sub>3</sub> SiH (2)       | 4 h, rt      | 98       | 15  |
| (IMes) <sub>2</sub> CuF•HF                   | 5     |   | none                      | Me(OEt) <sub>2</sub> SiH(1.5) | 25 min, rt   | >99      | 16  |
| Cu(OAc) <sub>2</sub> / (S)-BINAP             | 3     |  | none                      | Ph <sub>3</sub> SiH (1.2)     | 7 h, 0°C     | 94       | 17  |

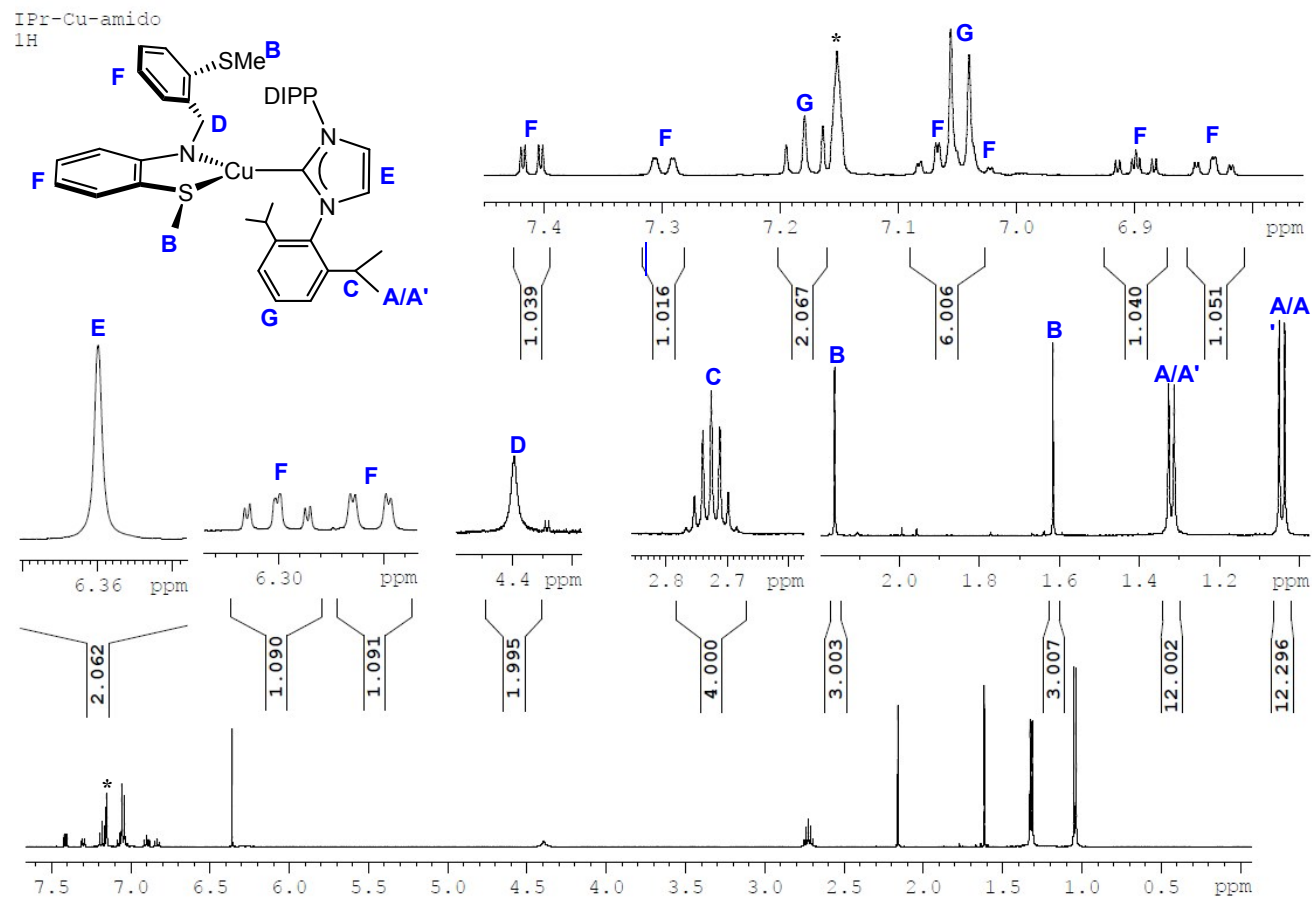

**Figure S1.** <sup>1</sup>H NMR spectrum of Cu(S<sup>Me</sup>NS<sup>Me</sup>)(IPr) (Cu-1). \* indicates C<sub>6</sub>D<sub>6</sub>.

IPr-Cu-amido  
13C

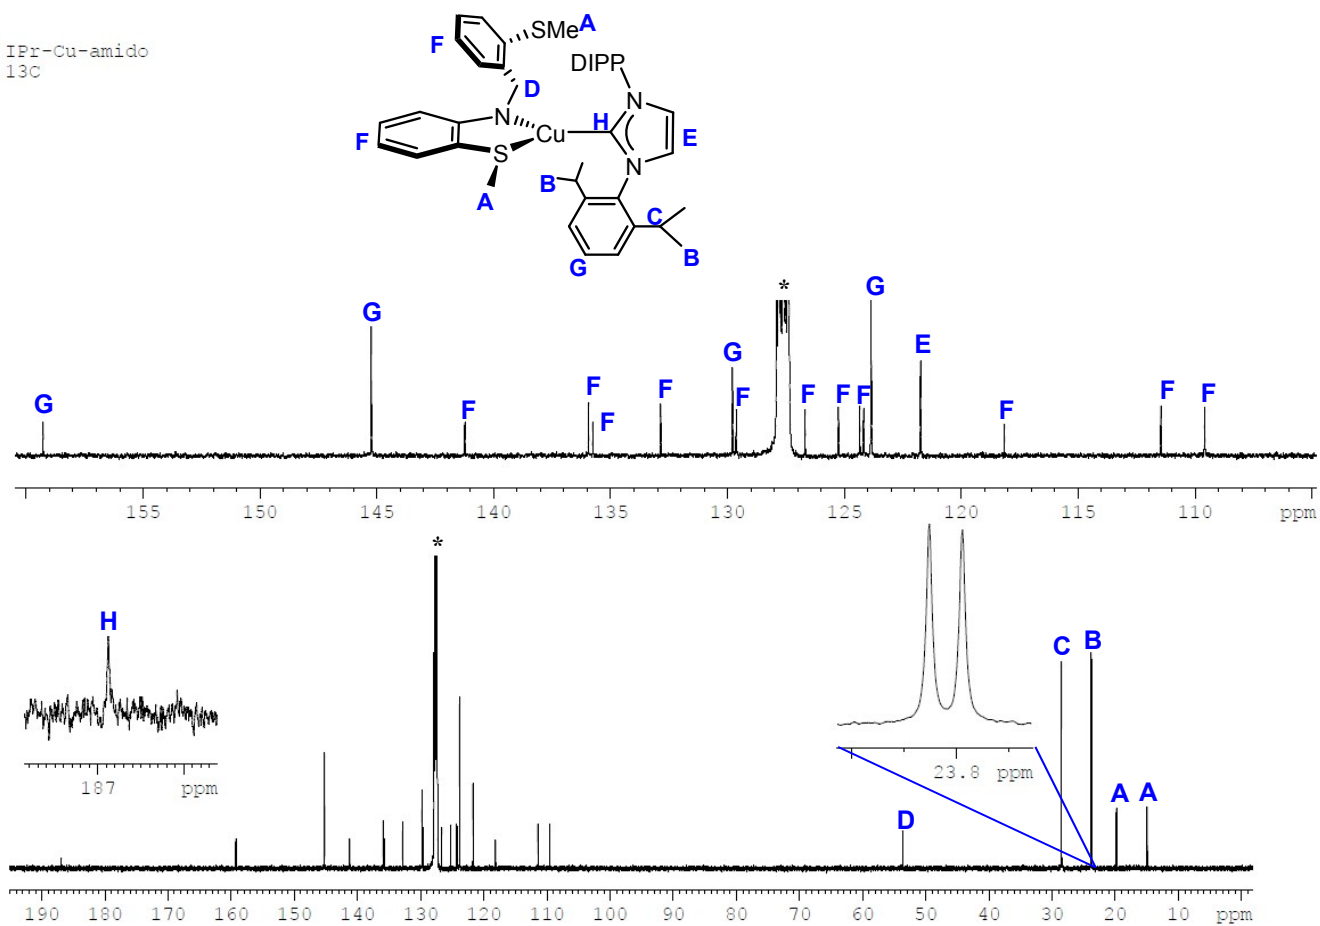

**Figure S2.** <sup>13</sup>C{<sup>1</sup>H} NMR spectrum of Cu(S<sup>Me</sup>NS<sup>Me</sup>)(IPr) (**Cu-1**). \* indicates C<sub>6</sub>D<sub>6</sub>.

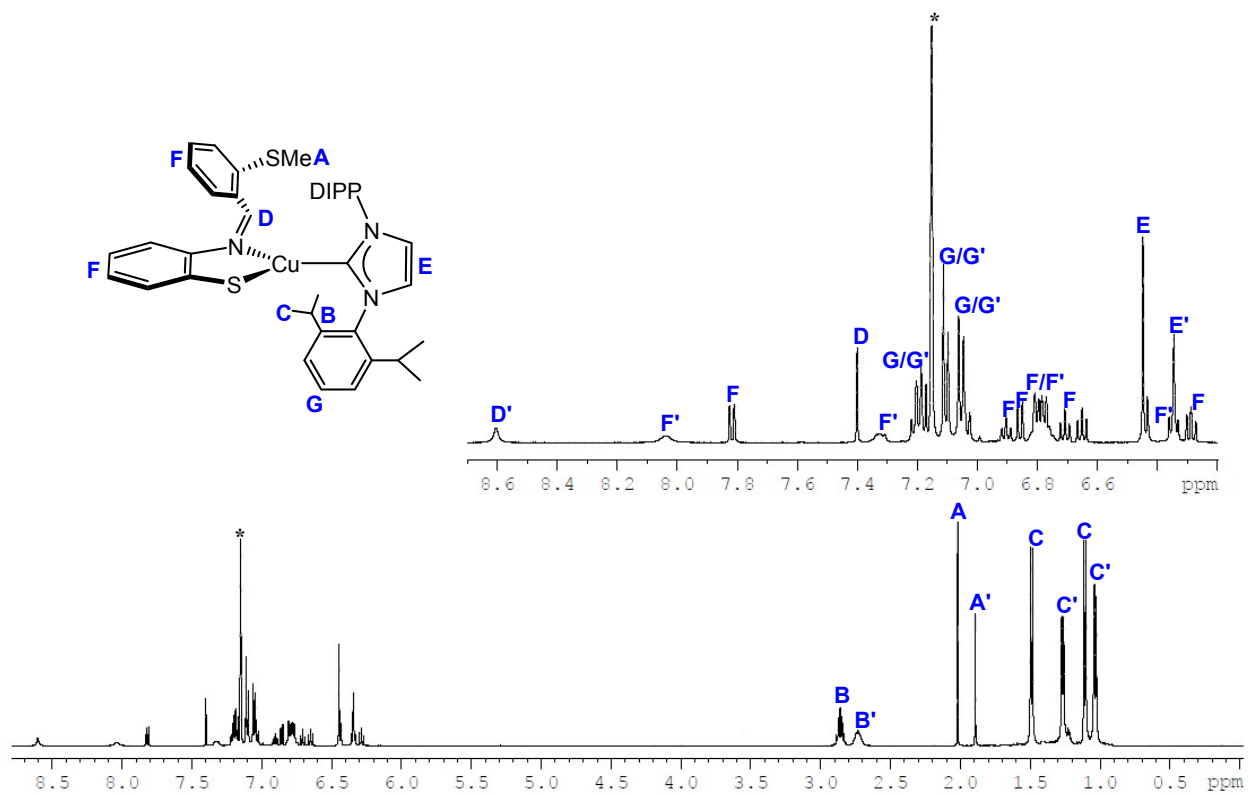

**Figure S3.**  $^1\text{H}$  NMR spectrum of  $\text{Cu}(\text{S}^{\text{Me}}\text{NS})(\text{IPr})$  (**Cu-2**). \* indicates  $\text{C}_6\text{D}_6$ .

IPr-Cu-thiolate  
13C

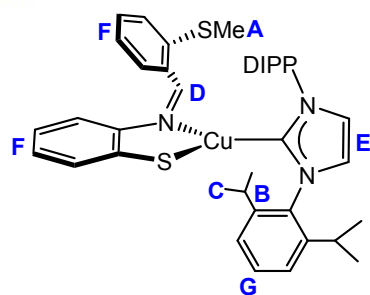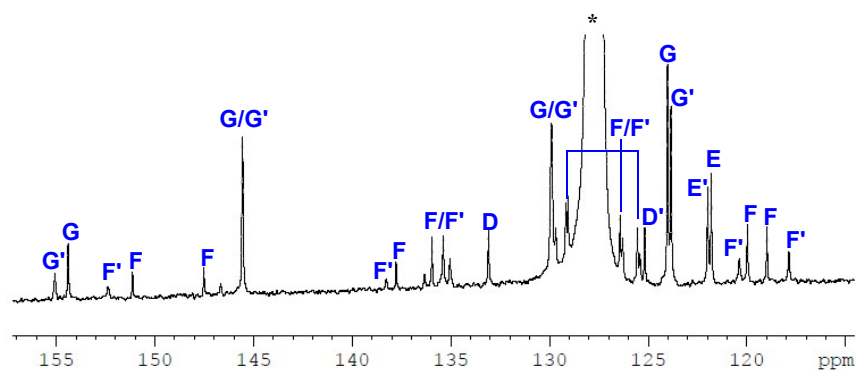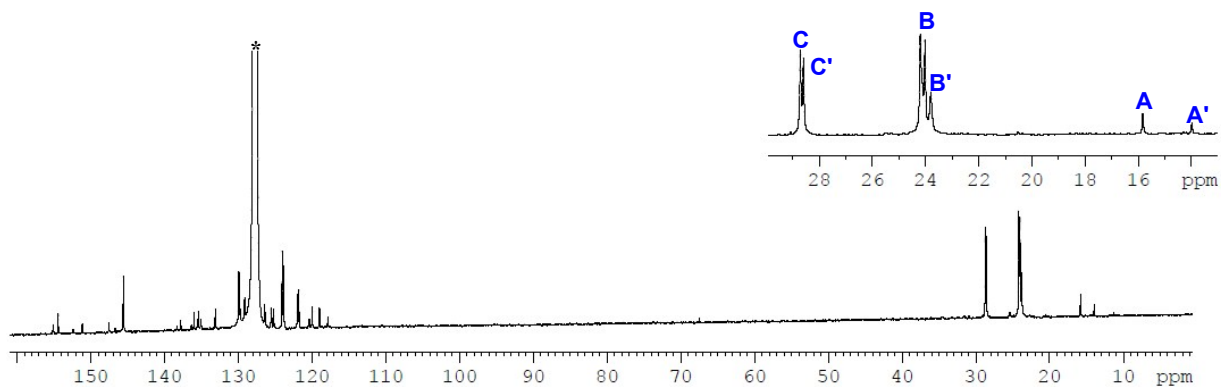

**Figure S4.**  $^{13}\text{C}\{^1\text{H}\}$  NMR spectrum of  $\text{Cu}(\text{S}^{\text{Me}}\text{NS})(\text{IPr})$  (**Cu-2**). \* indicates  $\text{C}_6\text{D}_6$ .

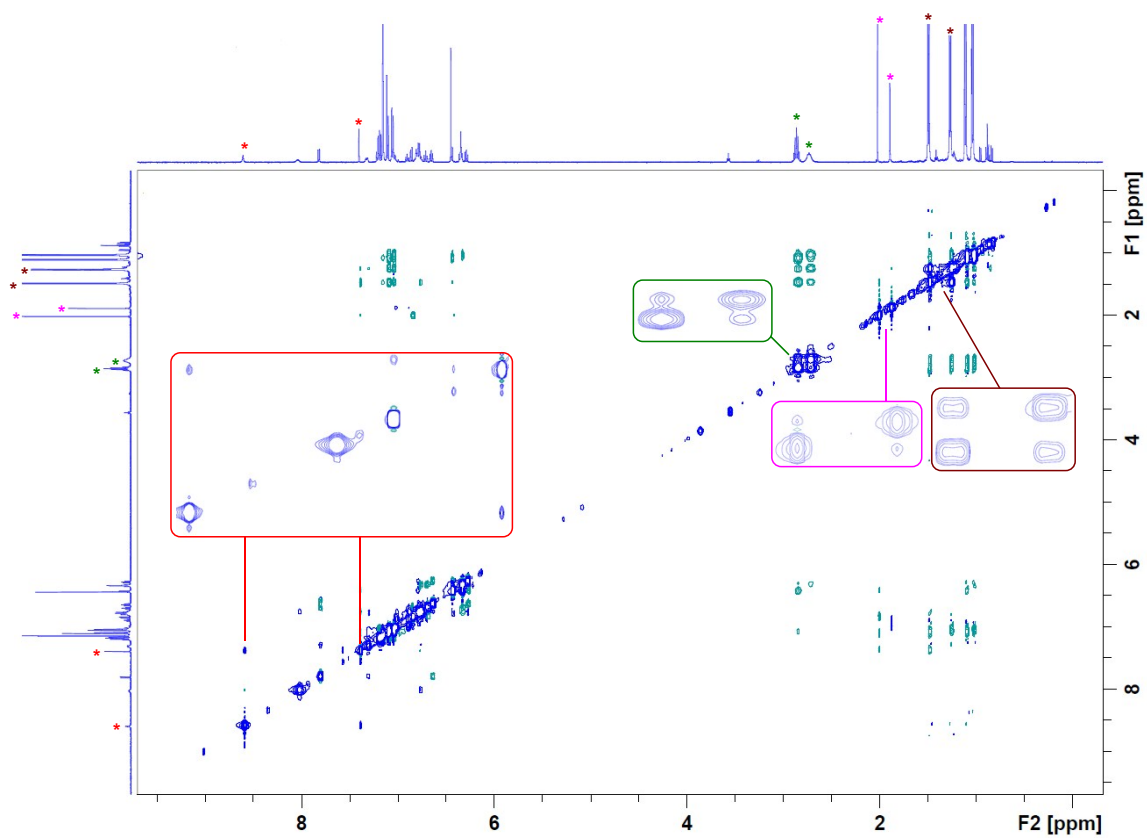

**Figure S5.** 2D  $^1\text{H}$  EXSY NMR spectrum of  $\text{Cu}(\text{S}^{\text{Me}}\text{NS})(\text{IPr})$  (**Cu-2**).

benzaldehyde hydroboration product  
1H NMR

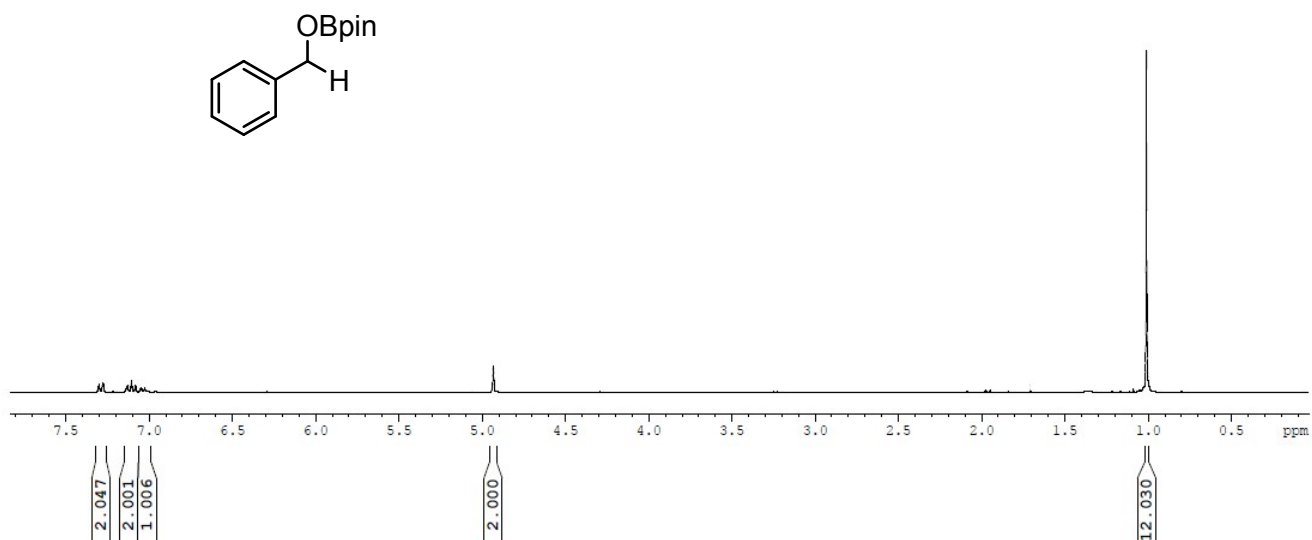

**Figure S6.**  $^1\text{H}$  NMR spectrum of benzaldehyde hydroboration product. \* indicates  $\text{C}_6\text{D}_6$ .

acetophenone hydroboration product  
1H NMR

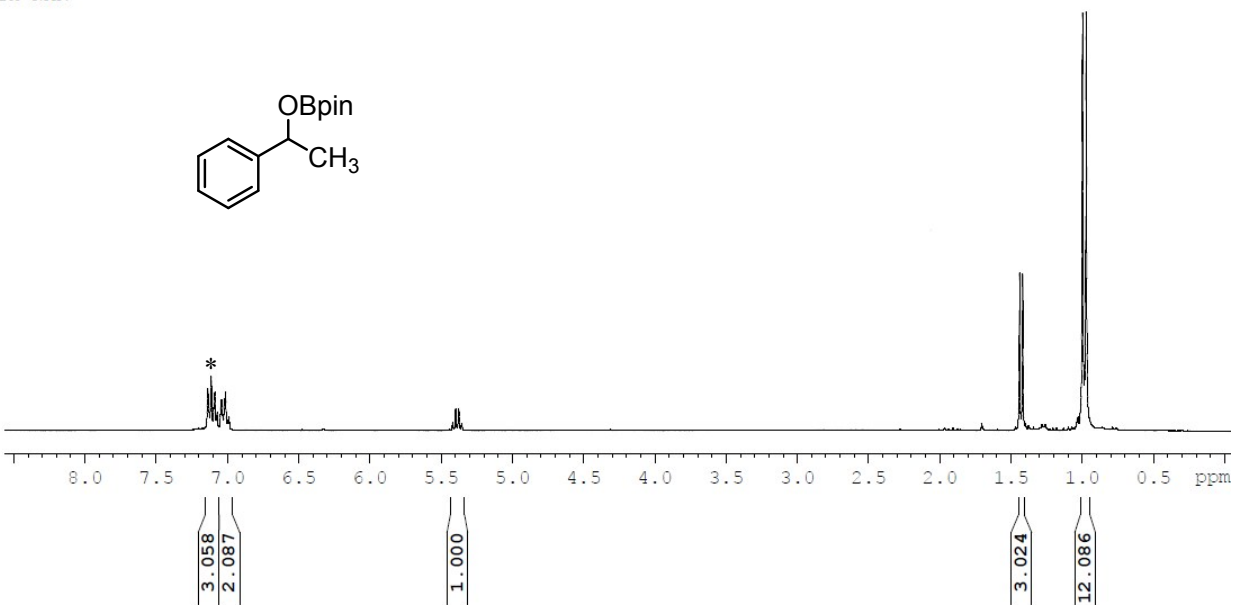

**Figure S7.**  $^1\text{H}$  NMR spectrum of acetophenone hydroboration product \* indicates  $\text{C}_6\text{D}_6$ .



benzophenone hydroboration  
1H

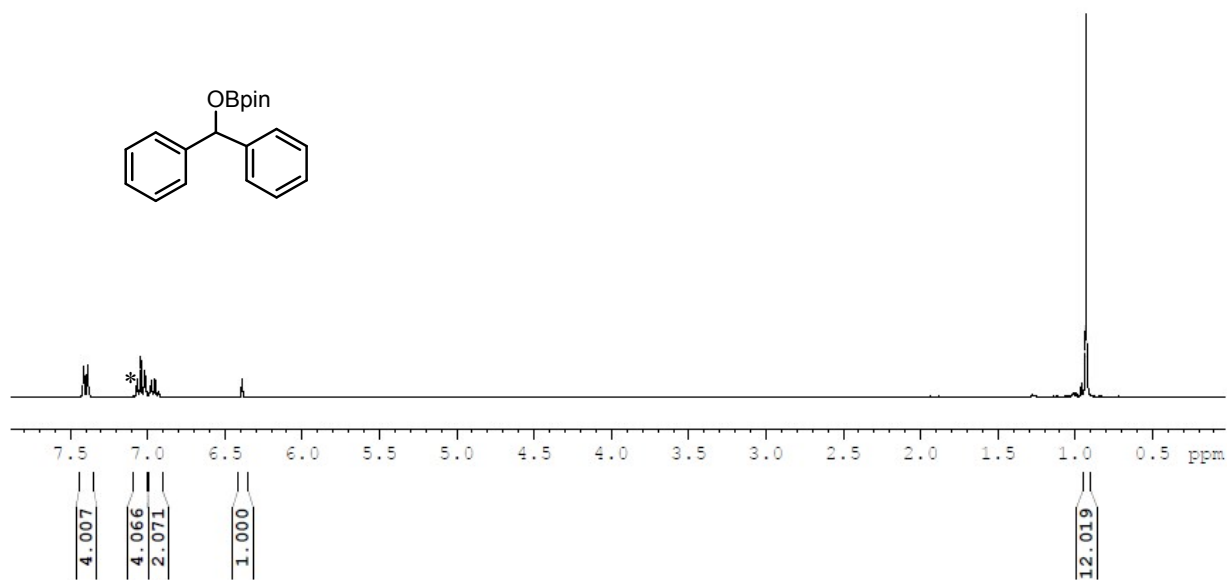

**Figure S8.** <sup>1</sup>H NMR spectrum of benzophenone hydroboration product \* indicates C<sub>6</sub>D<sub>6</sub>.

benzaldehyde hydrosilylation product  
1H NMR

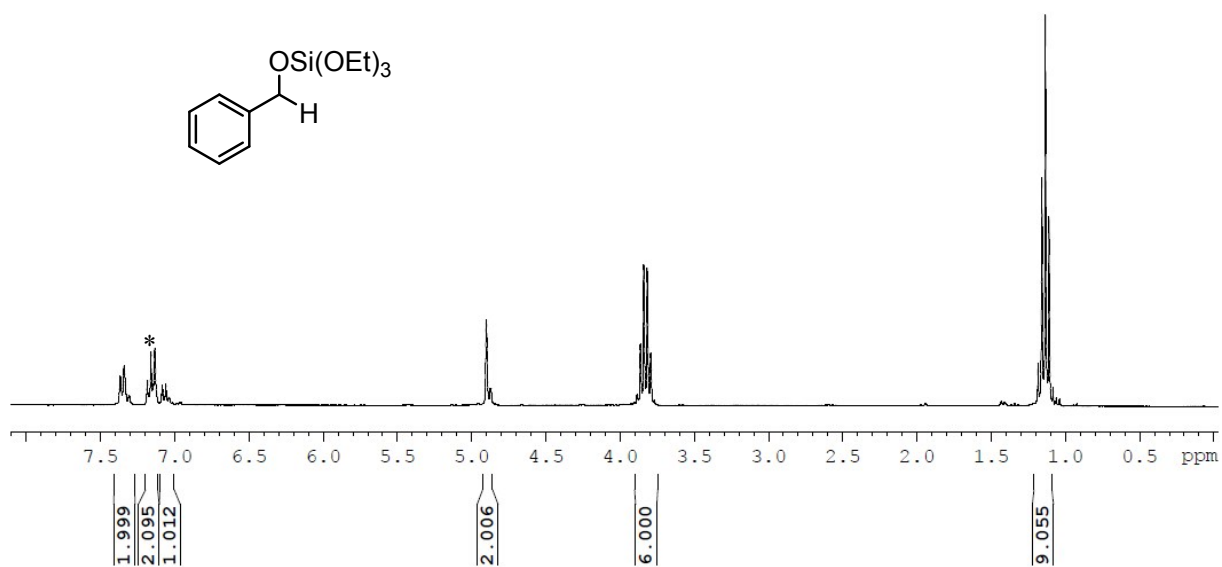

**Figure S9.** <sup>1</sup>H NMR spectrum of benzaldehyde hydrosilylation product \* indicates C<sub>6</sub>D<sub>6</sub>.

trans-cinnamaldehyde hydrosilylation  
1H

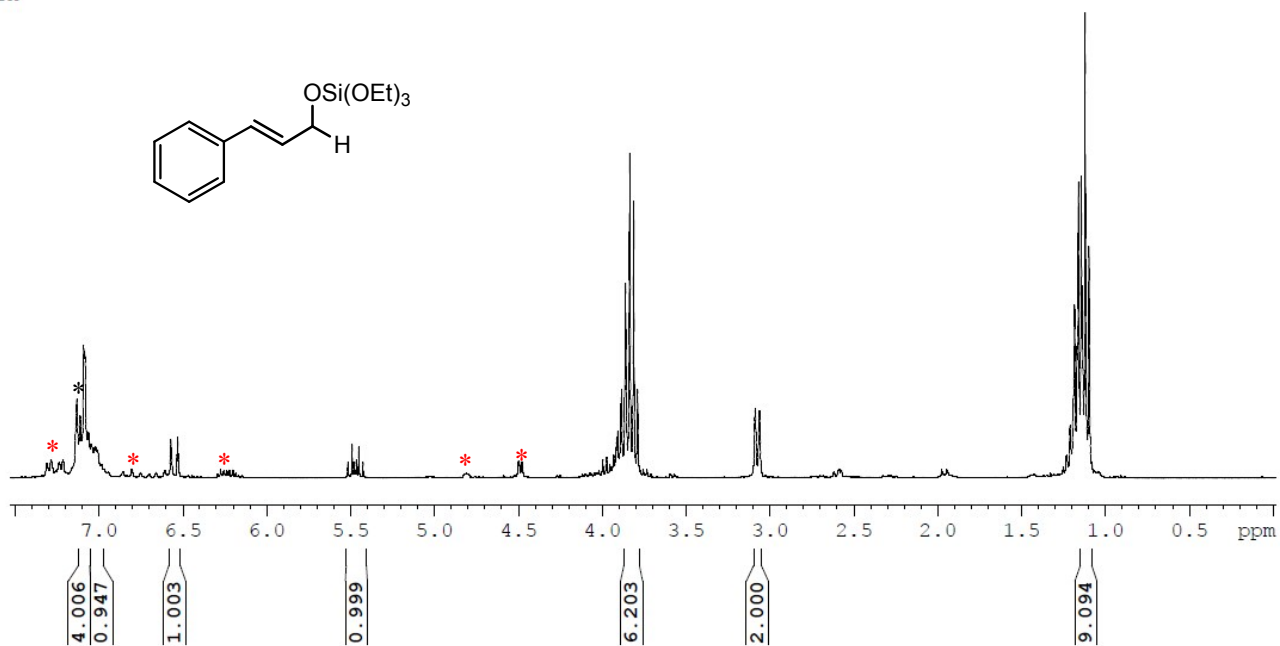

**Figure S10a.** <sup>1</sup>H NMR spectrum of *trans*-cinnamaldehyde hydrosilylation product. \* indicates  $C_6D_6$ . \* indicates unknown impurity.

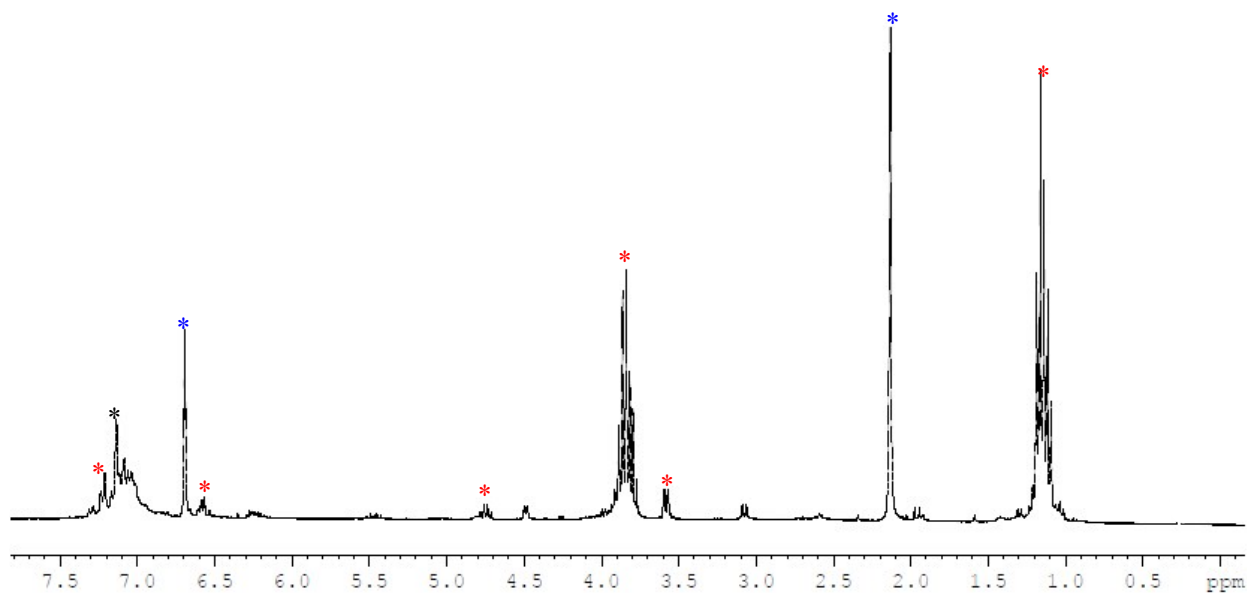

**Figure S10b.** <sup>1</sup>H NMR spectrum of *trans*-cinnamaldehyde hydrosilylation reaction mixture after 24 h. \* indicates  $C_6D_6$ . \* indicates *cis*-product. \* indicated internal standard mesitylene.

acetophenone hydrosilylation product  
1H NMR

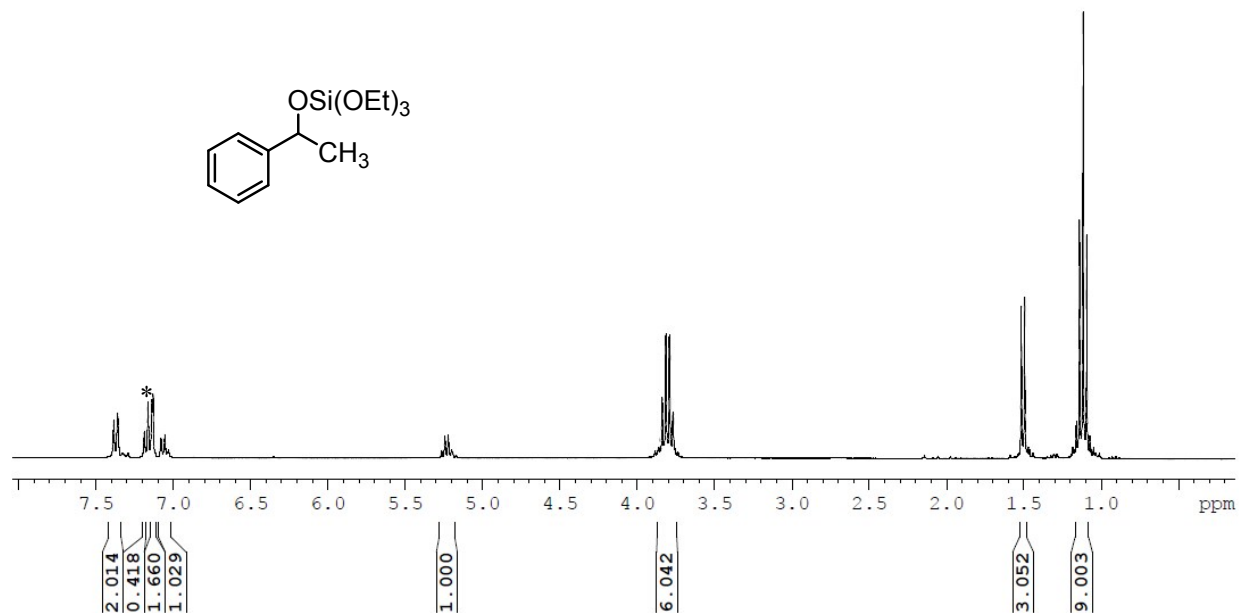

**Figure S11.**  $^1\text{H}$  NMR spectrum of acetophenone hydrosilylation product. \* indicates  $\text{C}_6\text{D}_6$ .

benzophenone hydrosilylation  
1H

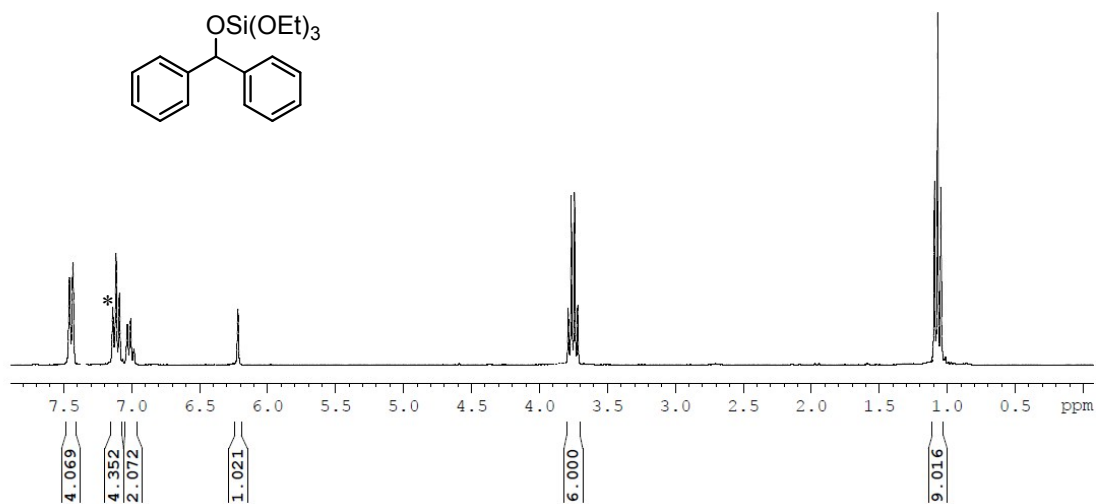

**Figure S12.**  $^1\text{H}$  NMR spectrum of benzophenone hydrosilylation product. \* indicates  $\text{C}_6\text{D}_6$ .

5-hexen-2-one hydrosilylation  
1H

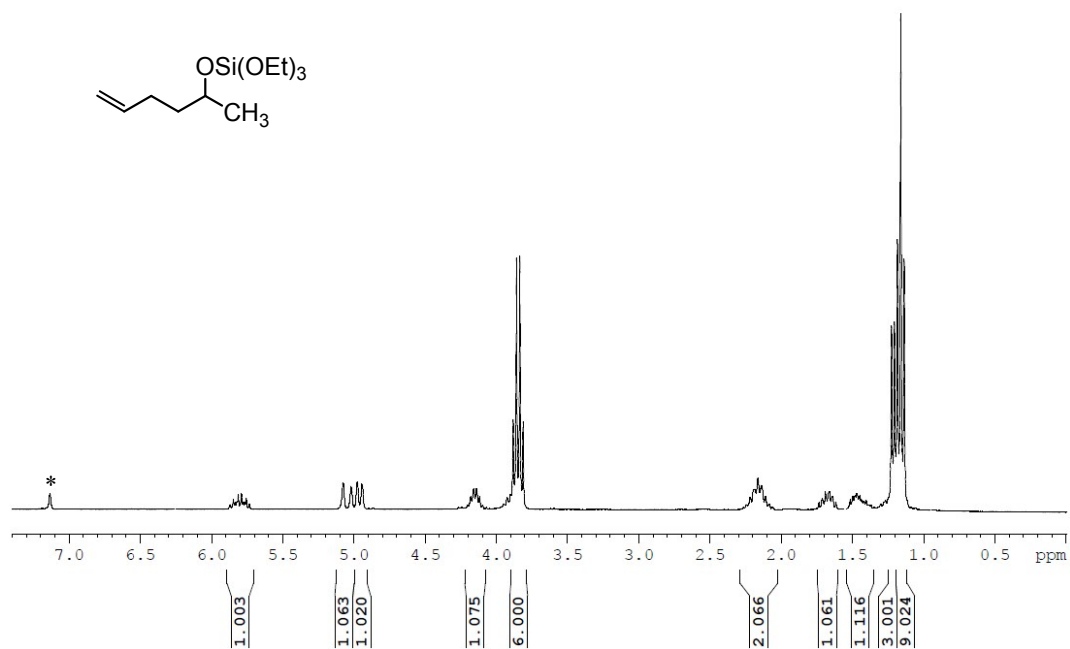

**Figure S13.**  $^1\text{H}$  NMR spectrum of 5-hexen-2-one hydrosilylation product. \* indicates  $\text{C}_6\text{D}_6$ .

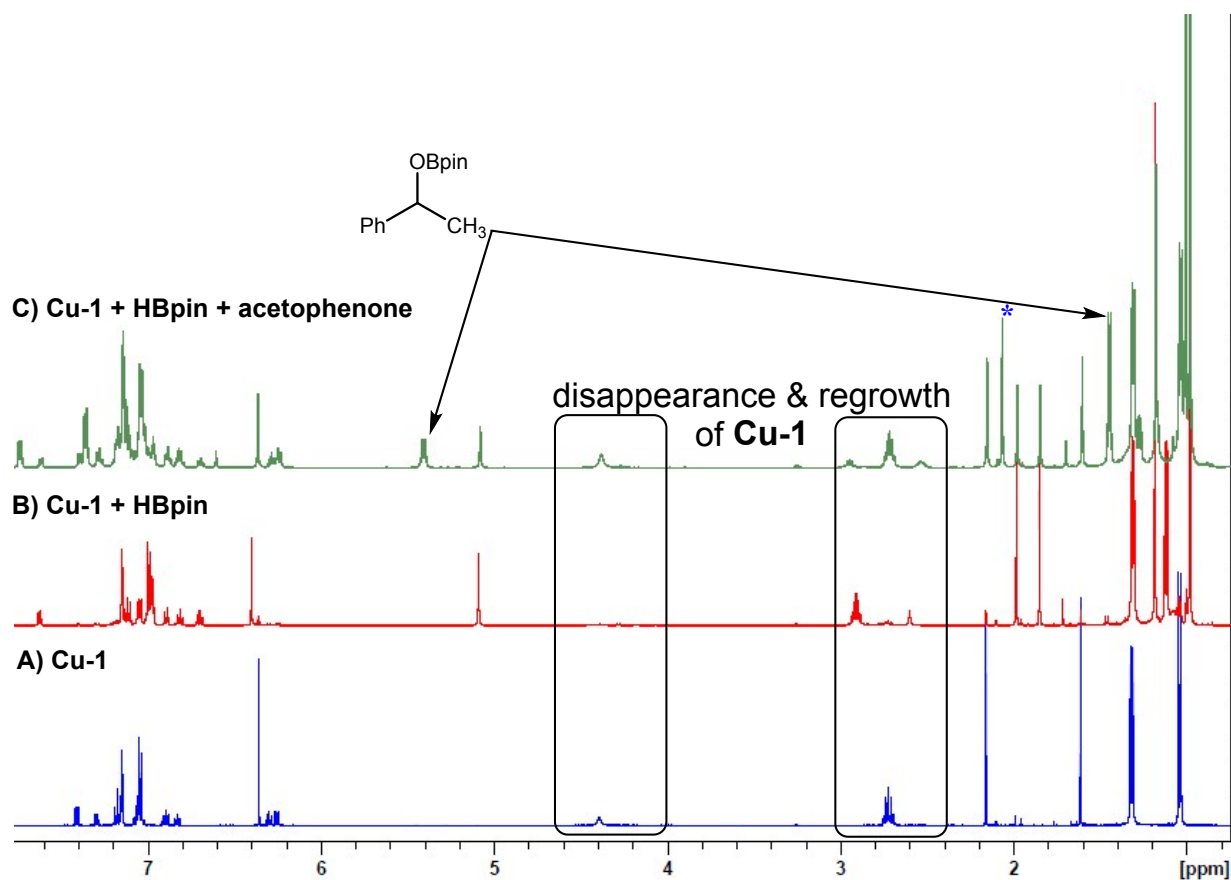

**Figure S14.** Stacked plot of  $^1\text{H}$  NMR spectra showing stoichiometric conversion from A) **Cu-1** to B) Cu–H intermediate, and C) subsequent conversion to hydroboration product, reforming **Cu-1**.

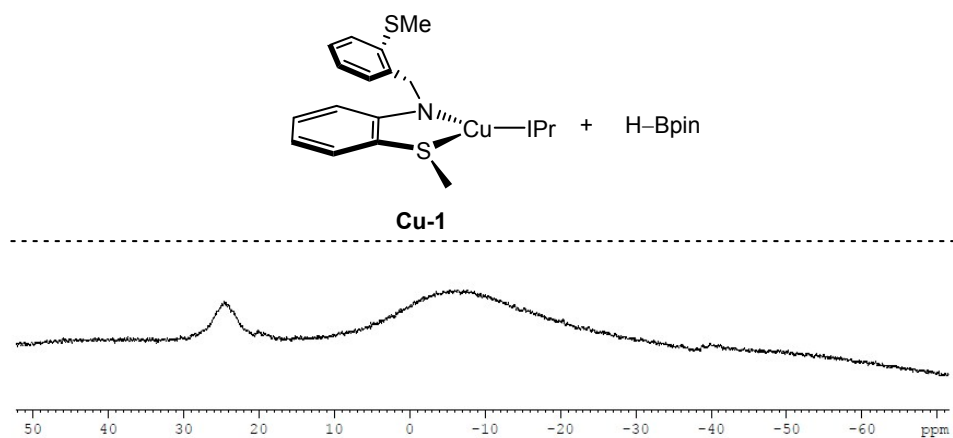

**Figure S15.**  $^{11}\text{B}$  NMR spectra showing stoichiometric reaction of **Cu-1** with pinacolborane.

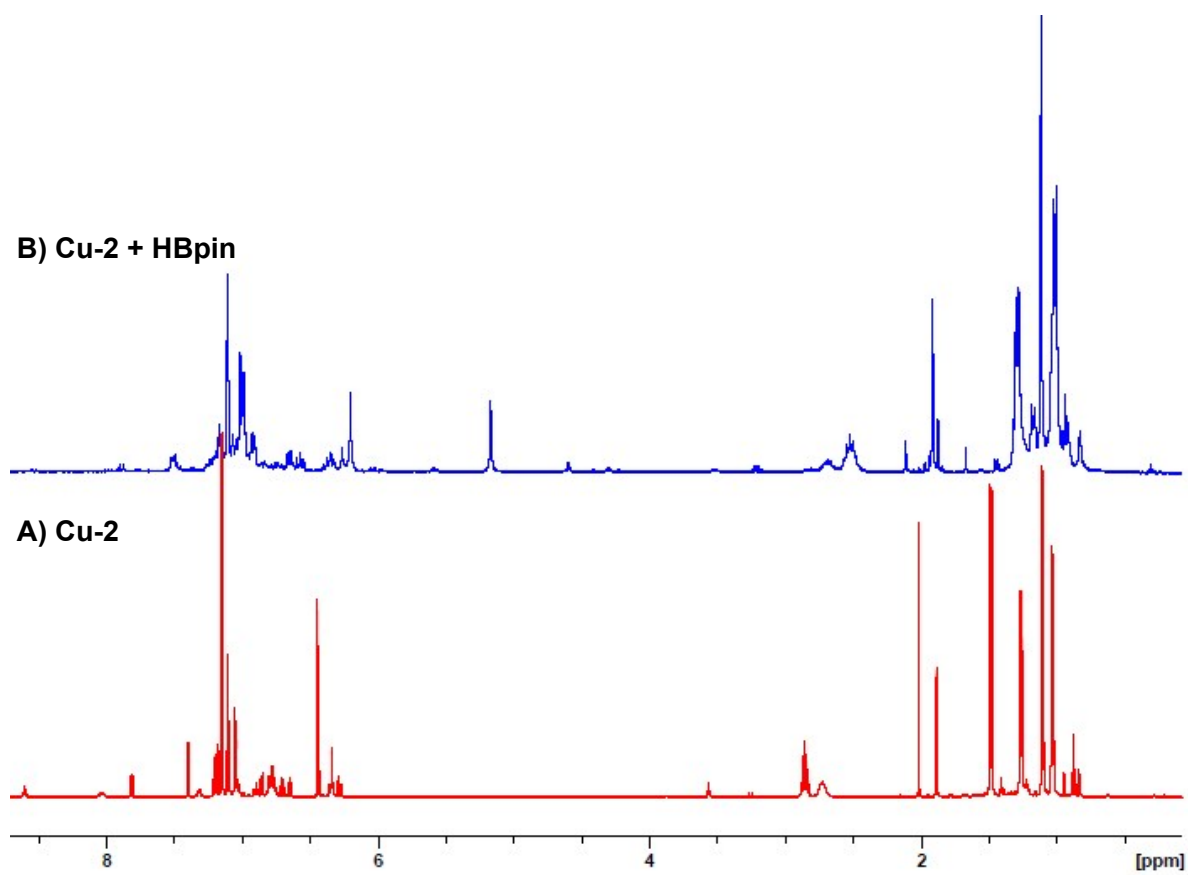

**Figure S16.** Stacked plot of  $^1\text{H}$  NMR spectra showing stoichiometric reaction of **Cu-2** with pinacolborane.

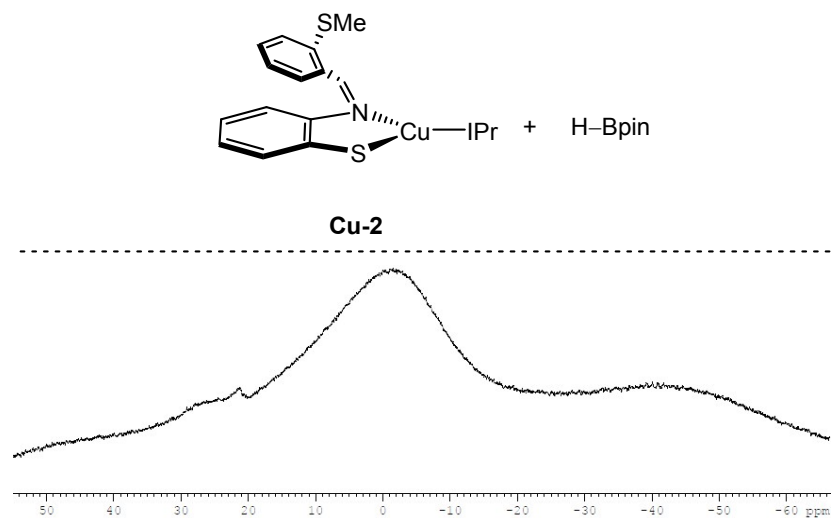

**Figure S17.**  $^{11}\text{B}$  NMR spectra showing stoichiometric reaction of **Cu-2** with pinacolborane.

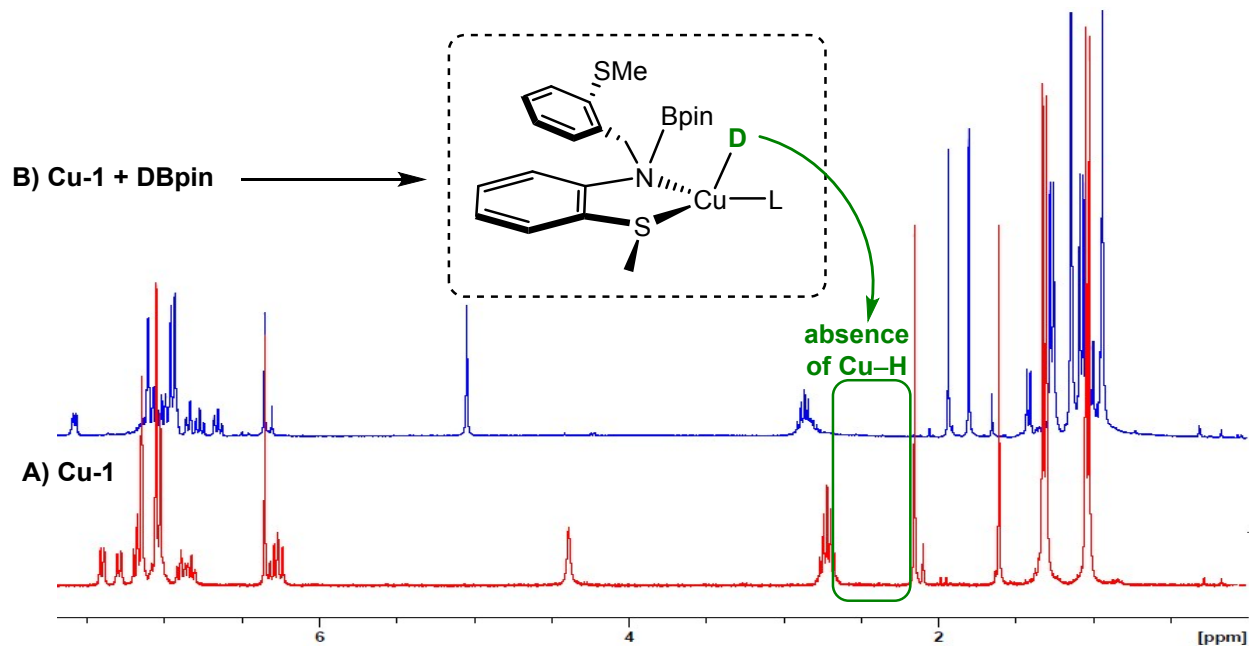

Figure S18.  $^1\text{H}$  NMR spectrum of reaction of **Cu-1** with DBpin.

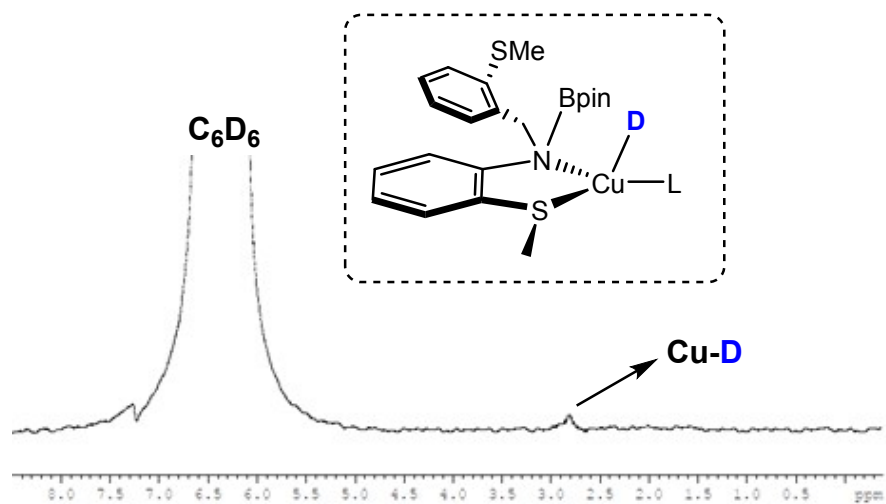

Figure S19.  $^2\text{H}$  NMR spectrum of reaction of **Cu-1** with DBpin.

## General Details: X-ray diffraction

The crystals were mounted on thin glass fibers using paraffin oil or cyanoacrylate glue. The crystals of **Cu-1** and **Cu-2** were cooled to  $200 \pm 2$  K during data collection. The data was collected on Bruker single-crystal diffractometer equipped with a sealed Mo tube source (wavelength 0.71073 Å) and APEX II CCD detector. The raw data collection and processing were performed with Bruker APEX II software package.<sup>18</sup> Semi-empirical absorption correction based on equivalent reflections were applied.<sup>19</sup> Systematic absences and unit cell parameters were consistent with monoclinic  $P2_1$  (#4) for **Cu-1**, monoclinic  $P2_1/c$  (#14) for **Cu-2**.

The structures were solved by intrinsic phasing and refined with full-matrix least-squares procedure based on  $F^2$ , using SHELXL.<sup>20</sup> All non-hydrogen atoms were refined anisotropically. The hydrogen atoms bonded to carbon atoms were placed in idealized positions.

### Refinement details for Cu-1.

Due to the value of the Flack parameter [0.463(9)], a centrosymmetric space group was considered ( $P21/m$ ), however a satisfactory structure solution was not obtained. The Flack value is therefore attributed to an inverse twin, for which the following Twin Law was applied:

TWIN -1 0 0 0 -1 0 0 0 -1

BASF 0.463

Two isopropyl carbons displayed disorder, each with 0.5 occupancy. The SADI and RIGU restraints were applied to C40, C41A, C42A, C41B, and C42B.

### Refinement details for Cu-2.

The structure was refined without additional restraints/constraints. No disorder was present.



**Table S2. Crystal data and structure refinement for IPr-Cu-amido (Cu-1).**

|                                             |                                                                 |
|---------------------------------------------|-----------------------------------------------------------------|
| Identification code                         | IPr-Cu-amido                                                    |
| Empirical formula                           | C <sub>42</sub> H <sub>52</sub> CuN <sub>3</sub> S <sub>2</sub> |
| Formula weight                              | 726.52                                                          |
| Temperature/K                               | 200.05                                                          |
| Crystal system                              | monoclinic                                                      |
| Space group                                 | P2 <sub>1</sub>                                                 |
| a/Å                                         | 12.471(8)                                                       |
| b/Å                                         | 13.794(9)                                                       |
| c/Å                                         | 13.094(8)                                                       |
| α/°                                         | 90                                                              |
| β/°                                         | 116.562(16)                                                     |
| γ/°                                         | 90                                                              |
| Volume/Å <sup>3</sup>                       | 2015(2)                                                         |
| Z                                           | 2                                                               |
| ρ <sub>calc</sub> /g/cm <sup>3</sup>        | 1.198                                                           |
| μ/mm <sup>-1</sup>                          | 0.677                                                           |
| F(000)                                      | 772.0                                                           |
| Crystal size/mm <sup>3</sup>                | 0.1 × 0.05 × 0.05                                               |
| Radiation                                   | MoKα (λ = 0.71073)                                              |
| 2θ range for data collection/°              | 3.478 to 56.164                                                 |
| Index ranges                                | -15 ≤ h ≤ 16, -17 ≤ k ≤ 18, -17 ≤ l ≤ 17                        |
| Reflections collected                       | 26692                                                           |
| Independent reflections                     | 9542 [R <sub>int</sub> = 0.0276, R <sub>sigma</sub> = 0.0312]   |
| Data/restraints/parameters                  | 9542/40/465                                                     |
| Goodness-of-fit on F <sup>2</sup>           | 1.050                                                           |
| Final R indexes [I >= 2σ (I)]               | R <sub>1</sub> = 0.0299, wR <sub>2</sub> = 0.0706               |
| Final R indexes [all data]                  | R <sub>1</sub> = 0.0345, wR <sub>2</sub> = 0.0731               |
| Largest diff. peak/hole / e Å <sup>-3</sup> | 0.45/-0.17                                                      |
| Flack parameter                             | 0.463(9)                                                        |

**Table S3. Bond Lengths for IPr-Cu-amido (Cu-1).**

| <b>Atom</b> | <b>Atom</b> | <b>Length/Å</b> | <b>Atom</b> | <b>Atom</b> | <b>Length/Å</b> |
|-------------|-------------|-----------------|-------------|-------------|-----------------|
| Cu1         | S1          | 2.4820(14)      | C8          | C9          | 1.554(4)        |
| Cu1         | N1          | 1.948(2)        | C3          | C4          | 1.396(5)        |
| Cu1         | C16         | 1.919(3)        | C9          | C10         | 1.397(4)        |
| S1          | C2          | 1.803(3)        | C9          | C14         | 1.421(4)        |
| S1          | C1          | 1.832(4)        | C18         | C17         | 1.351(3)        |
| S2          | C14         | 1.787(3)        | C7          | C6          | 1.452(4)        |
| S2          | C15         | 1.826(4)        | C33         | C34         | 1.397(4)        |
| N3          | C19         | 1.456(3)        | C25         | C27         | 1.551(4)        |
| N3          | C16         | 1.382(3)        | C25         | C26         | 1.544(5)        |
| N3          | C18         | 1.406(3)        | C24         | C23         | 1.403(4)        |
| N2          | C31         | 1.465(3)        | C24         | C28         | 1.552(4)        |
| N2          | C16         | 1.377(3)        | C10         | C11         | 1.410(5)        |
| N2          | C17         | 1.404(3)        | C37         | C39         | 1.548(5)        |
| N1          | C8          | 1.467(3)        | C37         | C38         | 1.531(5)        |
| N1          | C7          | 1.369(3)        | C21         | C22         | 1.395(4)        |
| C20         | C19         | 1.423(4)        | C40         | C42B        | 1.564(8)        |
| C20         | C25         | 1.543(4)        | C40         | C41B        | 1.512(8)        |
| C20         | C21         | 1.401(4)        | C40         | C41A        | 1.587(10)       |
| C31         | C36         | 1.415(3)        | C40         | C42A        | 1.514(10)       |
| C31         | C32         | 1.415(3)        | C14         | C13         | 1.423(5)        |
| C19         | C24         | 1.420(3)        | C23         | C22         | 1.396(5)        |
| C36         | C35         | 1.413(4)        | C28         | C30         | 1.539(4)        |
| C36         | C40         | 1.546(4)        | C28         | C29         | 1.546(5)        |
| C32         | C33         | 1.413(4)        | C11         | C12         | 1.387(6)        |
| C32         | C37         | 1.533(4)        | C4          | C5          | 1.389(5)        |
| C35         | C34         | 1.397(4)        | C6          | C5          | 1.396(4)        |
| C2          | C3          | 1.406(4)        | C13         | C12         | 1.394(6)        |
| C2          | C7          | 1.437(4)        |             |             |                 |

**Table S4. Crystal data and structure refinement for IPr-Cu-thiolate (Cu-2).**

|                                             |                                                                     |
|---------------------------------------------|---------------------------------------------------------------------|
| Identification code                         | IPr-Cu-thiolate                                                     |
| Empirical formula                           | C <sub>41</sub> H <sub>48</sub> CuN <sub>3</sub> S <sub>2</sub>     |
| Formula weight                              | 710.48                                                              |
| Temperature/K                               | 298.15                                                              |
| Crystal system                              | monoclinic                                                          |
| Space group                                 | P2 <sub>1</sub> /n                                                  |
| a/Å                                         | 12.955(3)                                                           |
| b/Å                                         | 15.654(3)                                                           |
| c/Å                                         | 19.260(4)                                                           |
| α/°                                         | 90                                                                  |
| β/°                                         | 95.175(13)                                                          |
| γ/°                                         | 90                                                                  |
| Volume/Å <sup>3</sup>                       | 3889.8(15)                                                          |
| Z                                           | 4                                                                   |
| ρ <sub>calc</sub> /g/cm <sup>3</sup>        | 1.213                                                               |
| μ/mm <sup>-1</sup>                          | 0.700                                                               |
| F(000)                                      | 1504.0                                                              |
| Crystal size/mm <sup>3</sup>                | 0.382 × 0.18 ×<br>0.179                                             |
| Radiation                                   | MoKα (λ =<br>0.71073)                                               |
| 2θ range for data collection/°              | 3.358 to 53.298                                                     |
| Index ranges                                | -13 ≤ h ≤ 16, -19<br>≤ k ≤ 19, -24 ≤ l ≤<br>24                      |
| Reflections collected                       | 36950                                                               |
| Independent reflections                     | 8089 [R <sub>int</sub> =<br>0.0405, R <sub>sigma</sub> =<br>0.0333] |
| Data/restraints/parameters                  | 8089/0/433                                                          |
| Goodness-of-fit on F <sup>2</sup>           | 1.011                                                               |
| Final R indexes [I >= 2σ (I)]               | R <sub>1</sub> = 0.0429,<br>wR <sub>2</sub> = 0.1005                |
| Final R indexes [all data]                  | R <sub>1</sub> = 0.0757,<br>wR <sub>2</sub> = 0.1161                |
| Largest diff. peak/hole / e Å <sup>-3</sup> | 0.52/-0.26                                                          |

**Table S5. Bond Lengths for IPr-Cu-thiolate (Cu-2).**

| <b>Atom</b> | <b>Atom</b> | <b>Length/Å</b> | <b>Atom</b> | <b>Atom</b> | <b>Length/Å</b> |
|-------------|-------------|-----------------|-------------|-------------|-----------------|
| Cu1         | S1          | 2.1802(8)       | C39         | C40         | 1.528(4)        |
| Cu1         | N1          | 2.130(2)        | C39         | C41         | 1.513(5)        |
| Cu1         | C15         | 1.889(2)        | C31         | C36         | 1.508(4)        |
| S1          | C1          | 1.743(3)        | C31         | C32         | 1.385(4)        |
| S2          | C13         | 1.751(3)        | C23         | C27         | 1.503(5)        |
| S2          | C14         | 1.752(4)        | C23         | C22         | 1.391(4)        |
| N2          | C18         | 1.446(3)        | C24         | C25         | 1.522(4)        |
| N2          | C15         | 1.367(3)        | C24         | C26         | 1.517(5)        |
| N2          | C17         | 1.371(3)        | C7          | C8          | 1.470(4)        |
| N3          | C30         | 1.446(3)        | C8          | C13         | 1.383(4)        |
| N3          | C15         | 1.350(3)        | C8          | C9          | 1.375(4)        |
| N3          | C16         | 1.382(3)        | C13         | C12         | 1.376(4)        |
| N1          | C6          | 1.416(3)        | C36         | C38         | 1.501(4)        |
| N1          | C7          | 1.275(3)        | C36         | C37         | 1.501(4)        |
| C18         | C19         | 1.385(4)        | C27         | C28         | 1.529(4)        |
| C18         | C23         | 1.383(3)        | C27         | C29         | 1.523(5)        |
| C30         | C35         | 1.399(4)        | C5          | C4          | 1.368(5)        |
| C30         | C31         | 1.381(4)        | C12         | C11         | 1.361(5)        |
| C17         | C16         | 1.326(4)        | C20         | C21         | 1.369(5)        |
| C19         | C24         | 1.496(4)        | C2          | C3          | 1.372(6)        |
| C19         | C20         | 1.394(4)        | C9          | C10         | 1.362(5)        |
| C1          | C6          | 1.380(4)        | C34         | C33         | 1.361(5)        |
| C1          | C2          | 1.384(4)        | C32         | C33         | 1.358(5)        |
| C35         | C39         | 1.501(4)        | C10         | C11         | 1.357(5)        |
| C35         | C34         | 1.394(4)        | C22         | C21         | 1.348(5)        |
| C6          | C5          | 1.395(4)        | C4          | C3          | 1.358(7)        |

## References

- 1) M. Espinal-Viguri, S. E. Neale, N. T. Coles, S. A. Macgregor, and R. L. Webster, *J. Am. Chem. Soc.* 2019, **141**, 1, 572-582.
- 2) H. Sakaguchi, Y. Uetake, M. Ohashi, T. Niwa, S. Ogoshi, and T. Hosoya, *J. Am. Chem. Soc.* 2017, **139**, 12855-12862.
- 3) U. K. Das, S. L. Daifuku, T. E. Iannuzzi, S. I. Gorelsky, I. Korobkov, B. Gabidullin, M. L. Neidig, and R. T. Baker, *Inorg. Chem.* 2017, **56**, 13766-13776.
- 4) U. K. Das, S. L. Daifuku, S. I. Gorelsky, I. Korobkov, M. L. Neidig, J. L. Le Roy, M. Murugesu, and R. T. Baker, *Inorg. Chem.* 2016, **55**, 987-997.
- 5) M. Arrowsmith, T. J. Hadlington, M. S. Hill, and G. Kociok-Kohn, *Chem. Commun.* 2012, **48**, 4567-4569.
- 6) E. Peterson, A. Y. Khalimon, R. Simionescu, L. G. Kuzmina, J. A. K. Howard, and G. I. Nikonov, *J. Am. Chem. Soc.* 2009, **131**, 908-909.
- 7) S. Vijjamarrri, V. K. Chidara, J. Rousova, and G. Du, *Catal. Sci. Technol.* 2016, **6**, 3886-3892.
- 8) S. Keess, A. Simonneau, and M. Oestreich, *Organometallics*, 2015, **34**, 790-799.
- 9) C. Boone, I. Korobkov, and G. I. Nikonov, *ACS. Catal.* 2013, **3**, 10, 2336-2340.
- 10) R. M. Coates, P. D. Senter, and W. R. Baker, *J. Org. Chem.* 1982, **47**, 3597-3607.
- 11) B. H. Lipshutz, W. Chrisman, and K. Noson, *Organomet. Chem.* 2001, **624**(1-2), 367-371.
- 12) S. Sirol, J. Courmarcel, N. Mostefai, and O. Riant, *Org. Lett.* 2001, **3**(25), 4111-4113.
- 13) H. Kaur, F. K. Zinn, E. D. Stevens, and S. P. Nolan, *Organometallics* 2004, **23**(5), 1157-1160.
- 14) S. Díez-González, H. Kaur, F. K. Zinn, E. D. Stevens, and S. P. Nolan, *J. Org. Chem.* 2005, **70**(12), 4784-4796.
- 15) S. Díez-González, N. M. Scott, and S. P. Nolan, *Organometallics* 2006, **25**(9), 2355-2358.
- 16) T. Vergote, F. Nagra, A. Welle, M. Luhmer, J. Wouters, N. Mager, and T. Leyssens, *Chem. Eur. J.* 2012, **18**(3), 793-798.
- 17) D. W. Lee and J. Yun, *Tet. Lett.* 2004, **45**, 5415-5417.
- 18) APEX 2, Bruker AXS Inc., Madison, Wisconsin, USA, 2012
- 19) G. M. Sheldrick, SADABS, Program for empirical absorption correction of area detector data, University of Göttingen, Germany, 1996.
- 20) G. M. Sheldrick, *Acta Cryst.* 2015, **C71**, 3-8.
